# Supplementary material
Source: PubMed Central journal article supplement (PMC2879922)
Supplement: supp_mol.109.061903_FigureS1.pdf [file supp_mol.109.061903_FigureS1.pdf]

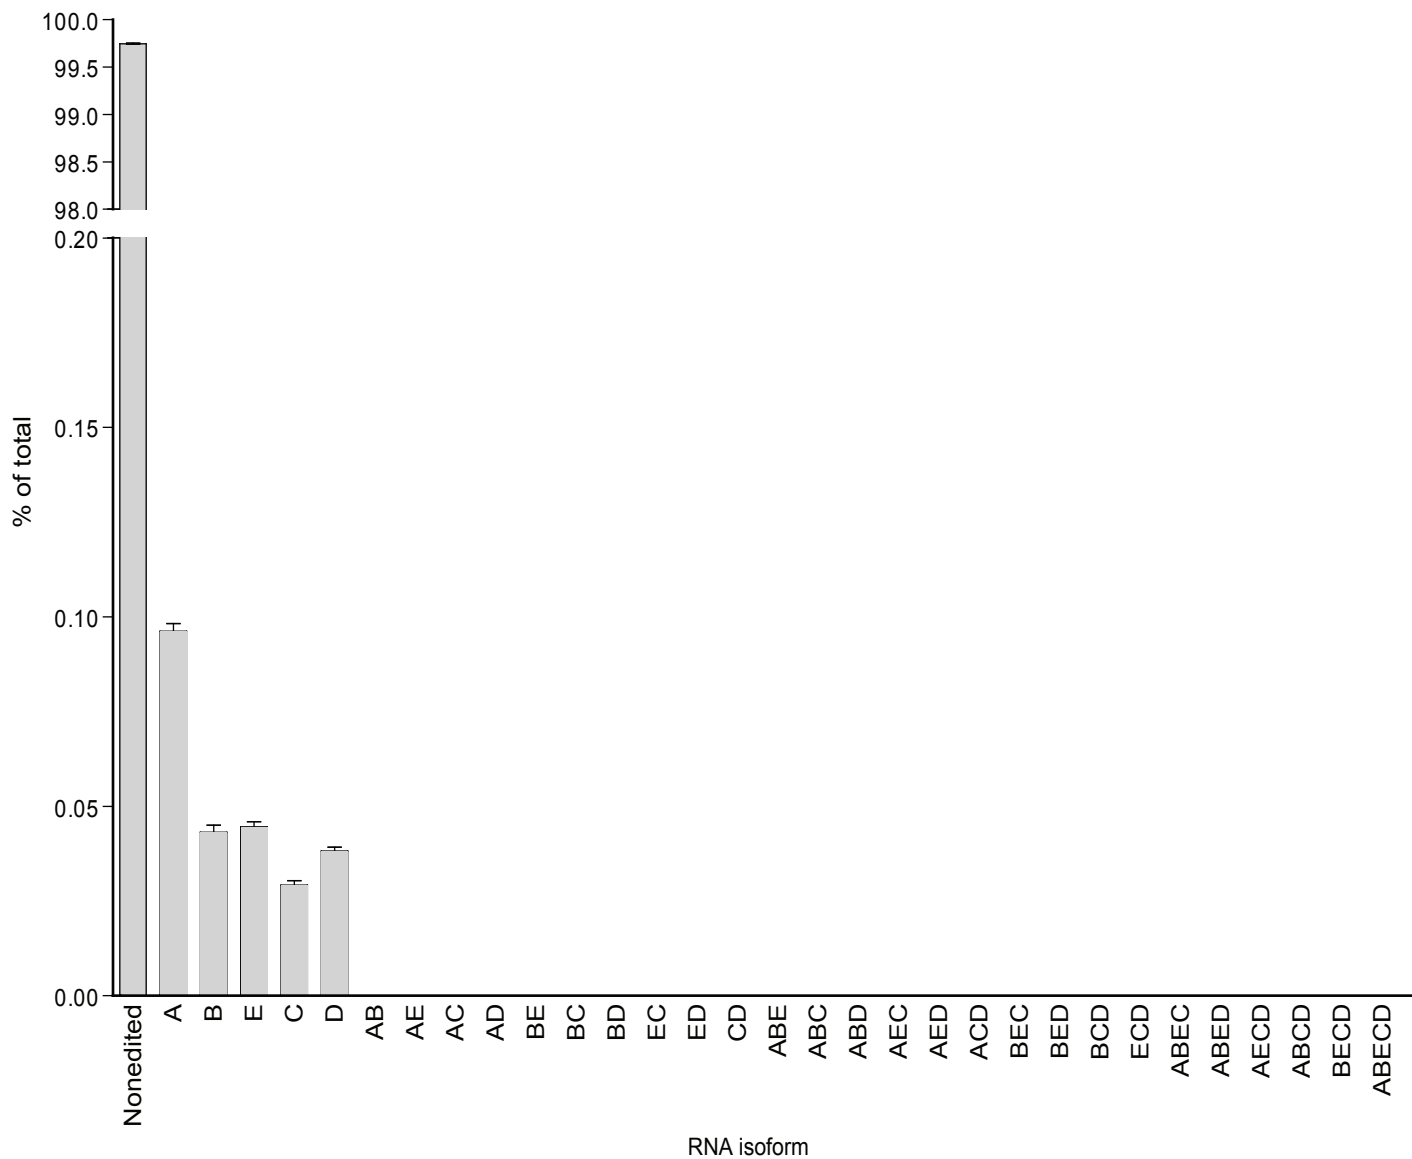

**Figure S1. Quantification of false discovery.** A non-edited human 5HT<sub>2C</sub> cDNA clone was analyzed by HTMTA to determine the level of editing isoforms resulting from A-to-G errors (n=5, mean ± SEM)
